# Supplementary material for: Synaptic Protein Phosphorylation Networks Are Associated With Electroacupuncture-Induced Circadian Control in the Suprachiasmatic Nucleus
Source: Front Genet. 2021 Dec 16;12:762557. doi: 10.3389/fgene.2021.762557 (PMC8717940; doi:10.3389/fgene.2021.762557)
Supplement: Supplementary file 1 [file Table2.XLSX]

## Sheet: EA-CT4vsCon-CT4
Protein accession	Position	Amino acid	Regulated Type	Protein description	Gene name	Con-CT0-2	Con-CT0-1	Con-CT4-2	Con-CT4-1	Con-CT8-2	Con-CT8-1	Con-CT12-1	Con-CT12-2	Con-CT16-1	Con-CT16-2	Con-CT20-1	Con-CT20-2	Mod-CT0-2	Mod-CT0-1	Mod-CT4-2	Mod-CT4-1	Mod-CT8-2	Mod-CT8-1	Mod-CT12-1	Mod-CT12-2	Mod-CT16-1	Mod-CT16-2	Mod-CT20-1	Mod-CT20-2	Res-CT0-2	Res-CT0-1	Res-CT4-2	Res-CT4-1	Res-CT8-2	Res-CT8-1	Res-CT12-1	Res-CT12-2	Res-CT16-1	Res-CT16-2	Res-CT20-1	Res-CT20-2	Mod-CT0-2/Con-CT0-2 Ratio	Mod-CT0-1/Con-CT0-1 Ratio	Mod-CT12-1/Con-CT12-1 Ratio	Mod-CT12-2/Con-CT12-2 Ratio	Mod-CT16-1/Con-CT16-1 Ratio	Mod-CT16-2/Con-CT16-2 Ratio	Mod-CT20-1/Con-CT20-1 Ratio	Mod-CT20-2/Con-CT20-2 Ratio
A2APX8	1939	S	Down	Sodium channel protein type 1 subunit alpha	Scn1a	0.937	1.701	1.549	1.975	1.397	2.036	1.524		1.301		1.475		1.09	1.004	0.969	1.041	1.119	1.065	1.079		1.017		0.977		1.205	1.586	0.985	1.193	1.064	1.661	1.077		1.147		1.274		1.163	0.591	0.708		0.781		0.663
P20357	1654	S	Down	Microtubule-associated protein 2	Map2	0.546	1.454	0.973	1.745	1.102	2.023							0.552	0.581	0.593	0.883	0.583	0.783							0.896	1.454	0.554	1.092	0.757	1.533							1.012	0.399
Q3UHD9	979	S	Down	"""Arf-GAP with GTPase, ANK repeat and PH domain-containing protein 2"""	Agap2	0.768	0.797	1.688	2.129	3.11	0.833	0.521	0.715	0.843	0.475	0.676	0.581	0.882	0.975	0.745	1.049	0.685	0.857	0.633	0.718	0.578	2.225	0.695	0.716	0.858	1.056	0.987	0.899	0.688	4.475	0.614	1.034	0.626	0.977	0.694	0.713	1.149	1.224	1.215	1.005	0.686	4.687	1.028	1.232
Q8BSS9	689	S	Down	Liprin-alpha-2	Ppfia2	0.58	1.103	2.722	1.877	0.716	1.43	0.741	0.41	5.198	1.89	1.035	0.49	0.677	0.775	1.07	0.979	0.905	0.962	1.309	0.884	0.238	0.404	0.787	0.719	0.93	1.304	0.822	1.106	0.316	1.217	1.168	0.709	0.803	0.531	1.103	0.509	1.168	0.703	1.767	2.153	0.046	0.214	0.76	1.469
Q8C1B1	1291	S	Down	Calmodulin-regulated spectrin-associated protein 2	Camsap2	0.756	1.173	0.911	1.847	0.906	1.88	1.817		1.76		2.026		0.617	0.932	0.663	1.403	0.779	0.475	1.559		1.191		0.624		1.145	1.936	0.452	1.093	0.655	1.806	1.186		1.547		1.186		0.816	0.795	0.858		0.677		0.308
Q8K4Z3	43	S	Down	NAD(P)H-hydrate epimerase	Naxe	0.284	0.426	4.384	2.319	0.454	2.946	2.587	0.321	0.391	0.322	4.94	0.289	0.565	0.392	0.474	1.964	2.553	0.417	0.505	0.412	2.013	3.115	0.516	0.342	3.05	0.569	0.425	0.634	0.521	4.876	0.476	0.36	0.809	0.368	0.523	0.472	1.99	0.921	0.195	1.284	5.143	9.661	0.105	1.185
Q9CTN8	220	S	Down	LHFPL tetraspan subfamily member 3 protein	Lhfpl3	0.891	1.323	1.053	1.683	0.882	1.051	1.04	1.325	2.025	0.593	1.261	1.03	0.795	0.891	0.731	0.837	0.896	1.266	1.3	1.314	1.21	1.655	1.493	1.267	1.111	0.975	0.584	0.936	0.718	0.859	0.51	1.6	1.269	1.752	0.578	1.478	0.893	0.673	1.249	0.992	0.598	2.79	1.184	1.23
Q9EQH3	7	S	Up	Vacuolar protein sorting-associated protein 35	Vps35	1.709	1.675	1.71	1.415	1.671	1.702	1.313	1.596	1.062	1.985	1.496	1.621	1.753	1.626	4.292	1.65	1.717	1.744	1.357	1.627	1.393	2.231	1.534	1.951	2.454	1.548	4.906	2.15	2.43	1.449	1.28	2.795	1.382	2.453	1.701	3.218	1.026	0.971	1.034	1.02	1.311	1.124	1.026	1.204
[truncated: 28 more columns]

## Sheet: EA-CT8vsCon-CT8
Protein accession	Position	Amino acid	Regulated Type	Protein description	Gene name	Con-CT0-2	Con-CT0-1	Con-CT4-2	Con-CT4-1	Con-CT8-2	Con-CT8-1	Con-CT12-1	Con-CT12-2	Con-CT16-1	Con-CT16-2	Con-CT20-1	Con-CT20-2	Mod-CT0-2	Mod-CT0-1	Mod-CT4-2	Mod-CT4-1	Mod-CT8-2	Mod-CT8-1	Mod-CT12-1	Mod-CT12-2	Mod-CT16-1	Mod-CT16-2	Mod-CT20-1	Mod-CT20-2	Res-CT0-2	Res-CT0-1	Res-CT4-2	Res-CT4-1	Res-CT8-2	Res-CT8-1	Res-CT12-1	Res-CT12-2	Res-CT16-1	Res-CT16-2	Res-CT20-1	Res-CT20-2	Mod-CT0-2/Con-CT0-2 Ratio	Mod-CT0-1/Con-CT0-1 Ratio	Mod-CT12-1/Con-CT12-1 Ratio	Mod-CT12-2/Con-CT12-2 Ratio	Mod-CT16-1/Con-CT16-1 Ratio	Mod-CT16-2/Con-CT16-2 Ratio	Mod-CT20-1/Con-CT20-1 Ratio	Mod-CT20-2/Con-CT20-2 Ratio
O88343	257	S	Down	Electrogenic sodium bicarbonate cotransporter 1	Slc4a4	0.839	1.367	0.844	1.013	1.07	1.812							0.75	0.749	0.587	0.652	0.818	0.951							0.895	1.051	0.634	0.981	0.701	0.846							0.894	0.548
Q6WVG3	153	S	Up	BTB/POZ domain-containing protein KCTD12	Kctd12	0.457	0.672	1.013	0.699	0.312	0.309							0.426	0.91	0.381	0.873	0.38	0.783							1.545	0.385	0.958	0.806	0.859	0.942							0.934	1.354
Q9JIX8	479	S	Down	Apoptotic chromatin condensation inducer in the nucleus	Acin1	1.076	1.731	1.207	1.548	1.259	2.077	1.663	1.106	1.85	0.846	1.858	0.868	0.653	0.744	0.746	0.919	0.913	1.131	1.089	0.947	1.157	0.778	0.983	0.539	1.26	1.64	0.74	1.453	0.78	1.274	1.289	1.128	1.43	0.962	1.14	0.705	0.607	0.43	0.655	0.856	0.625	0.92	0.529	0.621
[truncated: 28 more columns]

## Sheet: EA-CT16vsCon-CT16
Protein accession	Position	Amino acid	Regulated Type	Protein description	Gene name	Con-CT0-2	Con-CT0-1	Con-CT4-2	Con-CT4-1	Con-CT8-2	Con-CT8-1	Con-CT12-1	Con-CT12-2	Con-CT16-1	Con-CT16-2	Con-CT20-1	Con-CT20-2	Mod-CT0-2	Mod-CT0-1	Mod-CT4-2	Mod-CT4-1	Mod-CT8-2	Mod-CT8-1	Mod-CT12-1	Mod-CT12-2	Mod-CT16-1	Mod-CT16-2	Mod-CT20-1	Mod-CT20-2	Res-CT0-2	Res-CT0-1	Res-CT4-2	Res-CT4-1	Res-CT8-2	Res-CT8-1	Res-CT12-1	Res-CT12-2	Res-CT16-1	Res-CT16-2	Res-CT20-1	Res-CT20-2	Mod-CT0-2/Con-CT0-2 Ratio	Mod-CT0-1/Con-CT0-1 Ratio	Mod-CT12-1/Con-CT12-1 Ratio	Mod-CT12-2/Con-CT12-2 Ratio	Mod-CT16-1/Con-CT16-1 Ratio	Mod-CT16-2/Con-CT16-2 Ratio	Mod-CT20-1/Con-CT20-1 Ratio	Mod-CT20-2/Con-CT20-2 Ratio
O08553	522	S	Up	Dihydropyrimidinase-related protein 2	Dpysl2	1.201		1.356		1.269		53.494	4.949	1.606	4.937	10.757	5.135	1.385		4.144		1.069		11.342	6.157	6.608	6.067	7.951	7.145	1.424		3.925		1.361		6.017	10.193	9.151	9.427	7.121	10.224	1.153		0.212	1.244	4.114	1.229	0.739	1.391
P35436	1198	S	Up	"""Glutamate receptor ionotropic, NMDA 2A"""	Grin2a	2.3	5.484	3.766	4.491	3.343	5.337	9.493	5.371	2.574	3.425	5.651	4.4	3.547	4.826	11.995	5.015	3.656	4.663	5.156	6.03	4.181	4.88	4.757	5.399	2.696	5.096	9.669	5.284	3.085	5.26	5.139	5.553	5.376	5.385	4.376	4.85	1.542	0.88	0.543	1.123	1.624	1.425	0.842	1.227
P70698	562	S	Up	CTP synthase 1	Ctps1	3.847	3.139	6.71	2.897	6.262	4.026	4.348	2.401	1.533	2.001	3.111	2.091	5.773	4.603	9.105	4.134	6.58	4.074	3.533	3.011	2.495	3.465	3.531	2.442	7.545	3.459	7.805	4.223	6.471	3.535	2.467	2.824	3.705	3.782	2.802	3.073	1.501	1.467	0.813	1.254	1.627	1.732	1.135	1.168
Q04447	35	T	Up	Creatine kinase B-type	Ckb	1.552	0.923	1.743	1.082	1.098	1.078		0.946		0.819		0.7	1.67	0.932	1.059	1.136	1.123	1.253		1.012		0.916		0.9	1.381	1.101	1.417	0.984	1.449	1.073		0.999		1.371		1.213	1.077	1.009	0.651	1.07	1.256	1.119	1.837	1.285
Q3U2I3	467	S	Up	FTS and Hook-interacting protein	Fam160a2	0.841	1.601	1.358	1.282	1.248	1.435	1.401	1.146	0.679	0.447	1.648	0.537	1.209	1.492	1.311	1.969	1.192	1.671	1.418	2.153	1.32	2.21	0.917	1.121	1.136	1.576	1.146	1.481	1.044	1.511	1.031	1.733	1.256	1.831	1.283	2.127	1.437	0.932	1.012	1.88	1.944	4.946	0.556	2.087
Q3UHD9	382	S	Up	"""Arf-GAP with GTPase, ANK repeat and PH domain-containing protein 2"""	Agap2							3.745	1.423	0.825	1.489	1.73	1.547							2.077	2.054	1.083	1.677	1.573	1.495							1.546	2.169	2.006	2.261	1.169	2.247			0.555	1.443	1.314	1.126	0.909	0.966
Q3UN16	561	S	Up	Probable G-protein coupled receptor 162	Gpr162	1.673		1.86		1.584		2.437	1.764	1.514	1.426	2.485	1.446	1.893		2.12		1.894		2.825	1.837	2.424	2.19	2.437	1.673	1.931		2.251		1.732		2.926	1.908	2.839	2.581	2.1	1.949	1.131		1.159	1.041	1.601	1.536	0.98	1.157
Q52KI8	702	S	Up	Serine/arginine repetitive matrix protein 1	Srrm1	2.495	1.544	3.7	2.606	2.377	1.894	2.147	2.657	1.661	2.582	1.983	3.109	3.621	3.446	3.558	3.035	2.872	3.511	3.069	3.524	2.758	3.27	3.252	3.472	3.057	2.292	3.621	2.62	3.101	2.152	2.194	2.895	2.952	3.928	2.467	3.916	1.452	2.231	1.43	1.326	1.66	1.267	1.64	1.117
Q62433	346	T	Up	Protein NDRG1	Ndrg1	2.738	4.798	4.25	5.143	4.222	5.442	8.15	19.056	5.566	9.827	7.094	5.525	4.695	4.342	8.402	4.757	3.896	7.011	8.327	11.703	7.627	9.065	7.178	8.643	3.534	8.07	9.331	4.956	3.957	7.242	8.428	19.475	9.529	15.631	9.333	10.34	1.715	0.905	1.022	0.614	1.37	0.922	1.012	1.564
Q6NZJ6	1597	S	Up	Eukaryotic translation initiation factor 4 gamma 1	Eif4g1	2.09	6.262	3.035	7.149	2.604	7.022	3.827	1.998	2.326	1.638	4.477	1.525	3.094	7.123	10.316	6.918	2.637	7.928	5.4	1.967	4.221	2.993	4.397	1.925	2.487	6.51	8.686	4.855	2.73	6.015	4.921	2.481	3.655	3.13	5.29	2.212	1.48	1.137	1.411	0.984	1.814	1.828	0.982	1.262
Q6ZPJ0	736	S	Up	Testis-expressed protein 2	Tex2	1.556	1.998	1.939	1.572	1.747	1.916	2.145	1.647	1.598	1.575	2.034	1.819	2.035	2.25	2.34	2.218	1.955	2.445	2.535	1.85	2.057	1.679	2.235	1.751	1.81	2.121	2.41	2.206	1.672	2.084	1.966	2.241	2.464	2.363	2.247	2.33	1.308	1.126	1.182	1.123	1.287	1.066	1.099	0.962
Q80YA9	906	S	Down	Connector enhancer of kinase suppressor of ras 2	Cnksr2	0.472	0.81	1.568	1.44	0.541	0.981	0.996	0.575	1.818	2.308	0.975	0.978	0.762	1.032	0.785	1.07	0.607	1.015	1.12	0.845	0.877	1.141	0.967	0.811	0.649	0.958	0.769	1.309	0.665	0.969	0.682	0.664	1.064	0.926	0.764	0.495	1.613	1.274	1.124	1.47	0.483	0.494	0.992	0.829
Q8BSS9	689	S	Down	Liprin-alpha-2	Ppfia2	0.58	1.103	2.722	1.877	0.716	1.43	0.741	0.41	5.198	1.89	1.035	0.49	0.677	0.775	1.07	0.979	0.905	0.962	1.309	0.884	0.238	0.404	0.787	0.719	0.93	1.304	0.822	1.106	0.316	1.217	1.168	0.709	0.803	0.531	1.103	0.509	1.168	0.703	1.767	2.153	0.046	0.214	0.76	1.469
Q8JZW4	575	S	Up	Copine-5	Cpne5	0.928	0.861	1.273	1.065	1.473	0.986	0.896	0.939	0.646	0.851	1.074	0.804	1.36	1.215	1.166	1.295	1.152	1.172	1.056	1.467	1.154	1.251	1.247	0.965	1.076	1.025	1.413	1.086	1.322	0.992	0.603	1.126	1.084	1.384	0.65	1.55	1.464	1.412	1.179	1.563	1.787	1.47	1.16	1.2
Q8JZW4	579	S	Up	Copine-5	Cpne5	1.22	1.114	1.373	1.041	1.473	1.308	0.896	0.939	0.646	0.851	1.074	0.804	1.192	1.155	1.217	1.391	1.12	1.287	1.056	1.467	1.154	1.251	1.247	0.965	1.084	1.198	1.244	1.109	1.162	1.064	0.603	1.126	1.084	1.384	0.65	1.55	0.977	1.037	1.179	1.563	1.787	1.47	1.16	1.2
Q8JZW4	583	S	Up	Copine-5	Cpne5	0.928	0.861	1.273	1.065	1.473	0.986	0.896	0.939	0.646	0.851	1.074	0.804	1.36	1.215	1.166	1.295	1.152	1.172	1.056	1.467	1.154	1.251	1.247	0.965	1.076	1.025	1.413	1.086	1.322	0.992	0.603	1.126	1.084	1.384	0.65	1.55	1.464	1.412	1.179	1.563	1.787	1.47	1.16	1.2
Q8JZW4	587	S	Up	Copine-5	Cpne5	0.928	0.861	1.273	1.065	1.473	0.986	0.896	0.939	0.646	0.851	1.074	0.804	1.36	1.215	1.166	1.295	1.152	1.172	1.056	1.467	1.154	1.251	1.247	0.965	1.076	1.025	1.413	1.086	1.322	0.992	0.603	1.126	1.084	1.384	0.65	1.55	1.464	1.412	1.179	1.563	1.787	1.47	1.16	1.2
Q8K2Y9	164	S	Down	Cerebral cavernous malformations protein 2 homolog	Ccm2		1.056		1.036		1.203	0.951	0.627	1.474	3.355	1.309	1.477		1.038		1.184		1.148	1.107	0.711	1.127	1.257	1.368	2.347		0.97		1.152		1.209	0.98	1.012	0.966	0.692	0.957	0.71		0.983	1.164	1.135	0.765	0.375	1.045	1.588
Q8K382	592	S	Up	DENN domain-containing protein 1A	Dennd1a	1.473	3.1	1.555	2.97	1.277	3.877	2.869	1.236	1.354	1.078	2.035	1.289	1.768	3.008	1.705	3.285	1.378	4.052	2.414	1.688	2.133	1.317	2.102	1.265	1.761	3.635	1.82	4.253	1.403	3.677	1.714	1.666	2.473	1.867	1.882	1.547	1.2	0.97	0.841	1.367	1.575	1.221	1.033	0.982
Q921T2	85	T	Up	Torsin-1A-interacting protein 1	Tor1aip1							2.361	1.917	1.426	1.401	2.135	1.855							2.175	2.395	1.912	1.946	2.177	2.54							1.902	2.059	2.182	2.624	2.033	2.701			0.921	1.249	1.34	1.389	1.02	1.37
Q9CY58	197	S	Up	Plasminogen activator inhibitor 1 RNA-binding protein	Serbp1	2.042	3.267	2.376	3.028	2.231	3.217	1.659	2.254	1.191	1.943	1.669	2.577	2.593	2.647	3.001	3.916	1.902	3.695	1.575	3.178	1.711	1.967	1.321	2.759	2.206	3.19	2.937	3.69	1.802	4.133	1.546	2.257	1.851	2.935	1.752	2.426	1.27	0.81	0.949	1.41	1.436	1.012	0.792	1.071
Q9ESN6	424	S	Up	Tripartite motif-containing protein 2	Trim2	1.048	1.045	1.296	1.232	1.156	1.23	1.684	1.196	0.865	0.8	1.242	1.254	1.298	1.164	1.572	1.096	1.155	1.311	1.381	1.319	1.195	1.307	1.404	1.257	1.365	1.091	1.538	1.156	1.248	1.176	1.092	1.231	1.379	1.386	1.199	1.366	1.238	1.114	0.82	1.103	1.381	1.634	1.131	1.002
Q9QYB5	64	S	Up	Gamma-adducin	Add3	0.68	0.702	0.927	0.738	0.872	0.731	0.458	0.934	0.764	0.506	1.078	0.455	0.745	0.859	0.834	0.946	1.128	0.739	0.585	0.498	0.774		0.537	0.837	1.024	0.872	0.872	1.336	1.06	1.187	0.619	1.086	1.193	2.608	1.101	1.065	1.097	1.224	1.279	0.533	1.013		0.498	1.841
Q9QYB8	62	S	Up	Beta-adducin	Add2							0.386	0.338	0.481	0.263	0.575	0.267							0.61	0.923	0.295	1.017	0.409	0.69							0.535	0.452	0.831	0.414	1.237	0.639			1.58	2.731	0.613	3.862	0.711	2.579
Q9QYR6	2603	S	Up	Microtubule-associated protein 1A	Map1a	2.148	4.211	2.895	3.823	2.826	4.485	7.67	3.646	2.059	3.208	3.91	3.748	2.444	3.905	5.424	4.108	2.298	4.419	4.12	3.555	3.362	4.165	3.671	4.334	2.436	4.227	5.017	4.489	2.104	4.281	3.383	5.219	3.739	4.851	3.626	3.856	1.138	0.928	0.537	0.975	1.633	1.298	0.939	1.156
Q9QYX7	4016	S	Down	Protein piccolo	Pclo	0.799	1.043	1.144	1.71	1.086	1.319	0.511	0.518	1.277	2.333	0.694	0.671	0.977	1.199	0.705	1.761	0.914	1.24	0.804	2.022	0.905	0.633	0.792	1.462	0.989	1.241	0.708	1.665	0.931	2.591	1.029	0.893	0.753	0.406	0.686	1.614	1.223	1.15	1.572	3.903	0.708	0.271	1.14	2.178
Q9WU42	2161	S	Up	Nuclear receptor corepressor 2	Ncor2	1.863		2.582		2.157		5.421	3.432	3.588	2.775	4.862	2.629	2.541		4.518		2.521		5.846	3.157	4.486	2.984	5.481	2.678	2.516		4.339		2.023		4.472	3.675	5.575	4.23	5.166	3.641	1.363		1.078	0.92	1.25	1.075	1.127	1.019
Q9WUU8	416	S	Up	TNFAIP3-interacting protein 1	Tnip1	0.871	0.886	1.04	0.937	1.087	0.88	1.307	0.826	1.168	0.397	1.422	0.932	1.172	0.841	1.057	0.991	1.007	0.74	1.187	0.811	0.985	0.852	1.35	0.602	1.133	0.88	1.101	1.013	0.882	1.106	1.119	0.745	1.833	1.004	1.364	1.104	1.345	0.95	0.908	0.981	0.843	2.143	0.949	0.646
[truncated: 28 more columns]
